# Supplementary material
Source: Springer Nature journal article supplement (https://www.springermedizin.de/resource/supplementary/12984_2008_155_MOESM6_ESM.pdf/9605420)

Elderly Group  $MT_E$  index

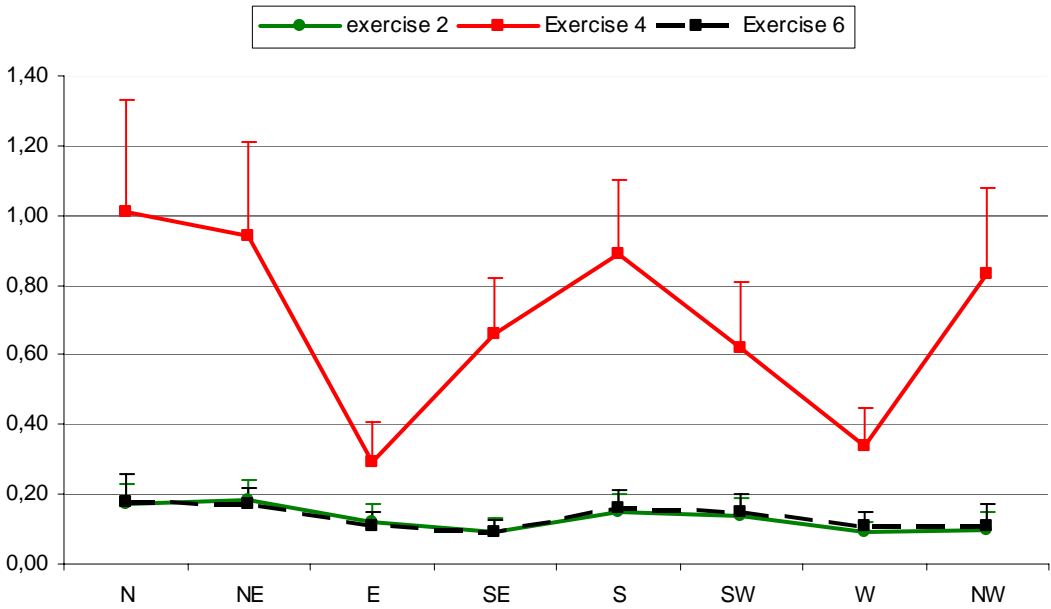

Young Group  $MT_E$  index

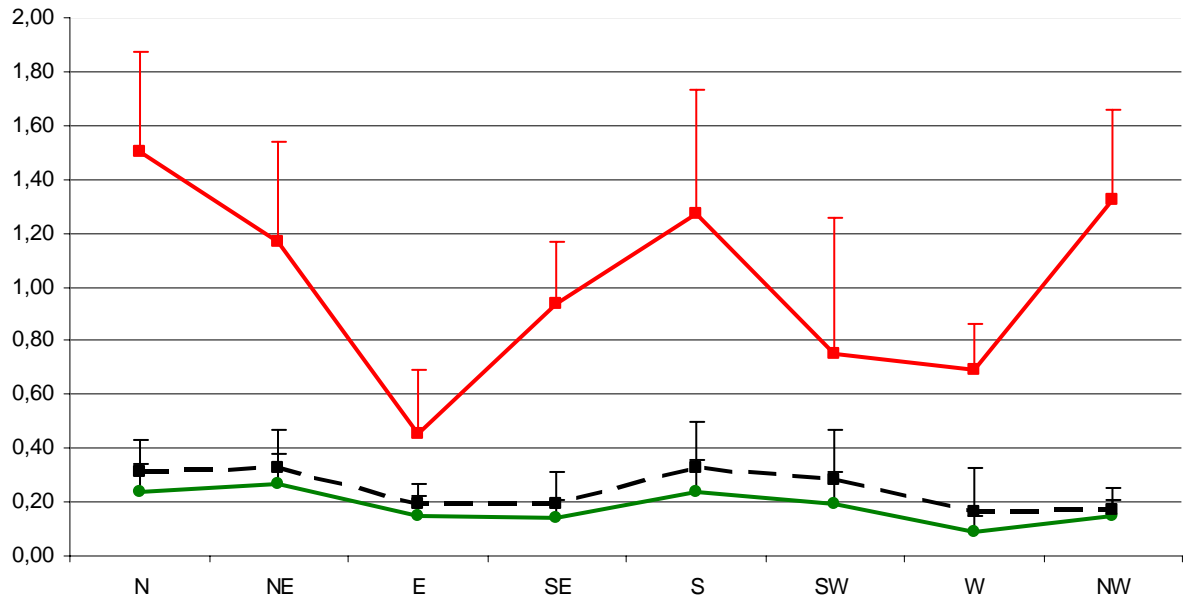

Supplement: MOESM6 [file 9605420]
